# Supplementary material
Source: publisher site journal article supplement (https://www.dovepress.com/article/569936)
Supplement: Supplementary file 1 [file 569936%20Supplementary%20Figures%20and%20Tables.docx]

**Supplemental Table S1** Overview of 9 TNBC samples selected for study with IMC summarizing clinicopathologic and immunohistochemical data. BR: Deidentified slide number; GR: Glucocorticoid receptor; H-score: Weighted histological (H) score for GR-expression; Regions of interest per slide: Number of analyzed regions per slide.

| Low GR Samples  (n=4) (H<100) | BR03 | BR19 | BR40 | BR42 |
| --- | --- | --- | --- | --- |
| Age | 54 | 34 | 45 | 73 |
| Race | Black | White | White | Black |
| GR H-score | 100 | 20 | 65 | 100 |
| Regions of interest per slide | 3 | 3 | 5 | 5 |
| High GR Samples  (n=5) (H>200) | BR07 | BR12 | BR15 | BR26 | BR35 |
| Age | 59 | 78 | 51 | 52 | 60 |
| Race | Black | Black | Black | Black | Black |
| GR H-score | 280 | 290 | 290 | 240 | 290 |
| Regions of interest per slide | 5 | 3 | 5 | 5 | 5 |

**Supplemental Table S2** GR status, deidentified patient ID, ROI area, and number of cells counted per ROI. All ROIs were obtained from a single slide derived from the same biopsy specimen per patient and represent technical sampling units rather than independent biological replicates; ROI number and size were comparable between GR-high and GR-low groups.

| **GR** | **Patient** | **Region** | **Acquisition area mm2** | **Number of cells** |
| --- | --- | --- | --- | --- |
| **Low** | Br_03 | Br_03_001 | 0.511602 | 3199 |
| **Low** | Br_03 | Br_03_002 | 0.46563 | 4137 |
| **Low** | Br_03 | Br_03_003 | 0.839938 | 6676 |
| **Low** | Br_19 | Br_19_001 | 0.631411 | 3787 |
| **Low** | Br_19 | Br_19_002 | 0.701932 | 4946 |
| **Low** | Br_19 | Br_19_003 | 0.782308 | 7589 |
| **Low** | Br_40 | Br_40_004 | 0.70152 | 4344 |
| **Low** | Br_40 | Br_40_005 | 0.670005 | 5059 |
| **Low** | Br_40 | Br_40_006 | 0.698985 | 4333 |
| **Low** | Br_40 | Br_40_007 | 0.71175 | 4974 |
| **Low** | Br_40 | Br_40_008 | 0.713135 | 5075 |
| **Low** | Br_42 | Br_42_001 | 0.915607 | 4842 |
| **Low** | Br_42 | Br_42_002 | 0.841825 | 4354 |
| **Low** | Br_42 | Br_42_003 | 0.90963 | 3578 |
| **Low** | Br_42 | Br_42_004 | 0.947477 | 6688 |
| **Low** | Br_42 | Br_42_005 | 0.911071 | 7700 |
| **High** | Br_07 | Br_07_001 | 0.781023 | 6556 |
| **High** | Br_07 | Br_07_002 | 0.756899 | 6745 |
| **High** | Br_07 | Br_07_003 | 0.823064 | 7832 |
| **High** | Br_07 | Br_07_004 | 0.819408 | 8370 |
| **High** | Br_07 | Br_07_005 | 0.751325 | 6358 |
| **High** | Br_12 | Br_12_001 | 0.752103 | 5351 |
| **High** | Br_12 | Br_12_002 | 0.771228 | 7261 |
| **High** | Br_12 | Br_12_003 | 0.789127 | 7499 |
| **High** | Br_15 | Br_15_001 | 0.703696 | 5930 |
| **High** | Br_15 | Br_15_002 | 0.714918 | 6107 |
| **High** | Br_15 | Br_15_003 | 0.701486 | 6127 |
| **High** | Br_15 | Br_15_004 | 0.715164 | 7468 |
| **High** | Br_15 | Br_15_005 | 0.7047 | 6347 |
| **High** | Br_26 | Br_26_001 | 0.782668 | 5936 |
| **High** | Br_26 | Br_26_002 | 0.723884 | 7300 |
| **High** | Br_26 | Br_26_003 | 0.774084 | 7009 |
| **High** | Br_26 | Br_26_004 | 0.7676 | 8510 |
| **High** | Br_26 | Br_26_005 | 0.686736 | 6568 |
| **High** | Br_35 | Br_35_001 | 0.75184 | 9503 |
| **High** | Br_35 | Br_35_002 | 0.745107 | 8559 |
| **High** | Br_35 | Br_35_003 | 0.754952 | 7763 |
| **High** | Br_35 | Br_35_004 | 0.751646 | 7545 |
| **High** | Br_35 | Br_35_005 | 0.756711 | 7549 |

Abbreviations: Br: Deidentified slide number; GR: Glucocorticoid receptor.


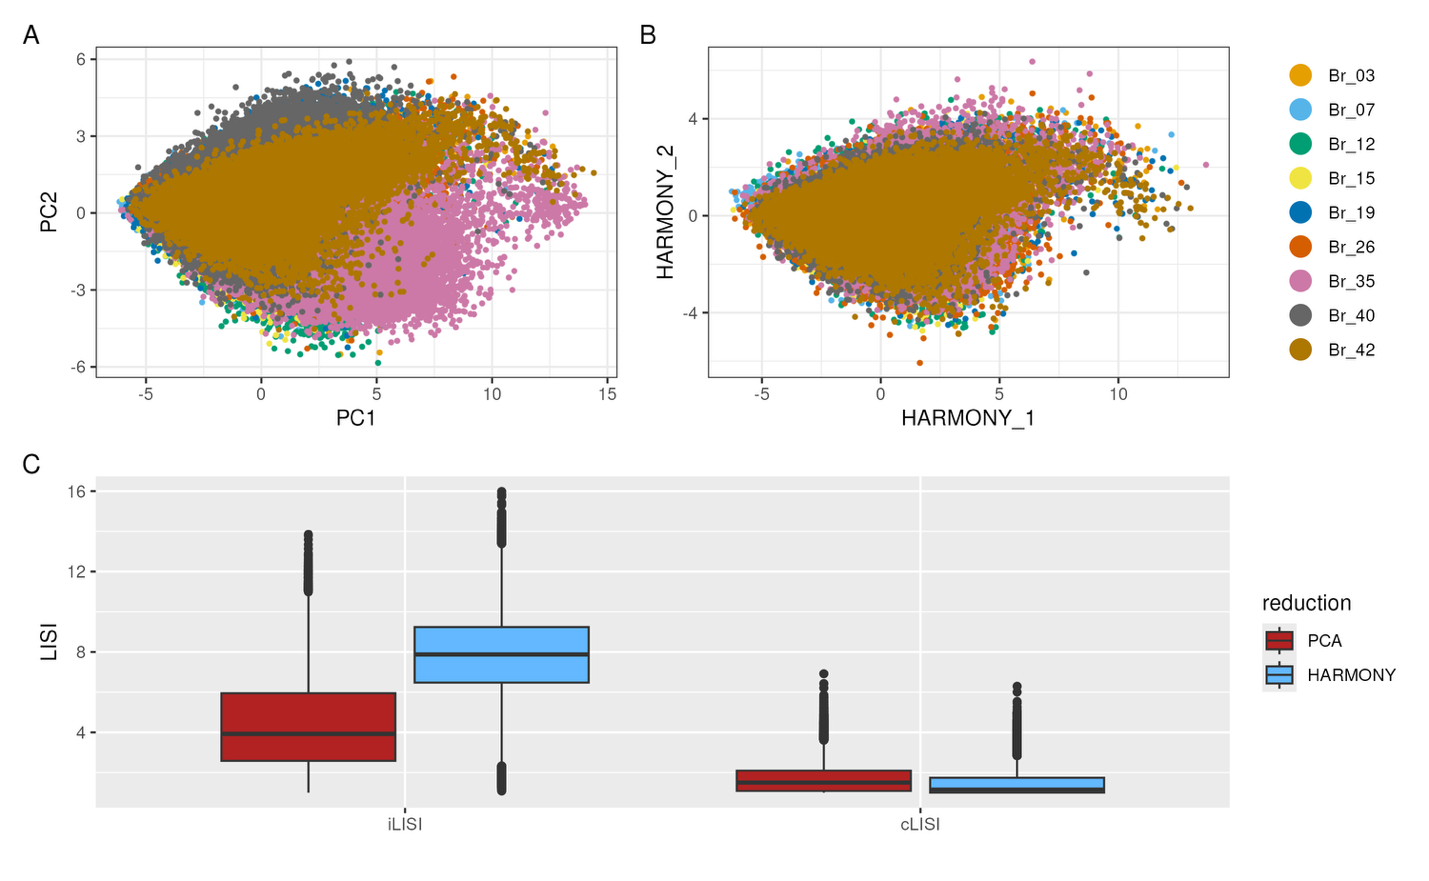


**Supplemental Figure S1** Evaluation of effectiveness of batch correction. (**A):** PCA plot of uncorrected embeddings. (**B):** Harmony plot of corrected embeddings. (**C):** iLISI (integration inverse local Simpson’s index) and cLISI (cell type inverse local Simpson’s index) shown before (PCA) and after (HARMONY) batch correction.


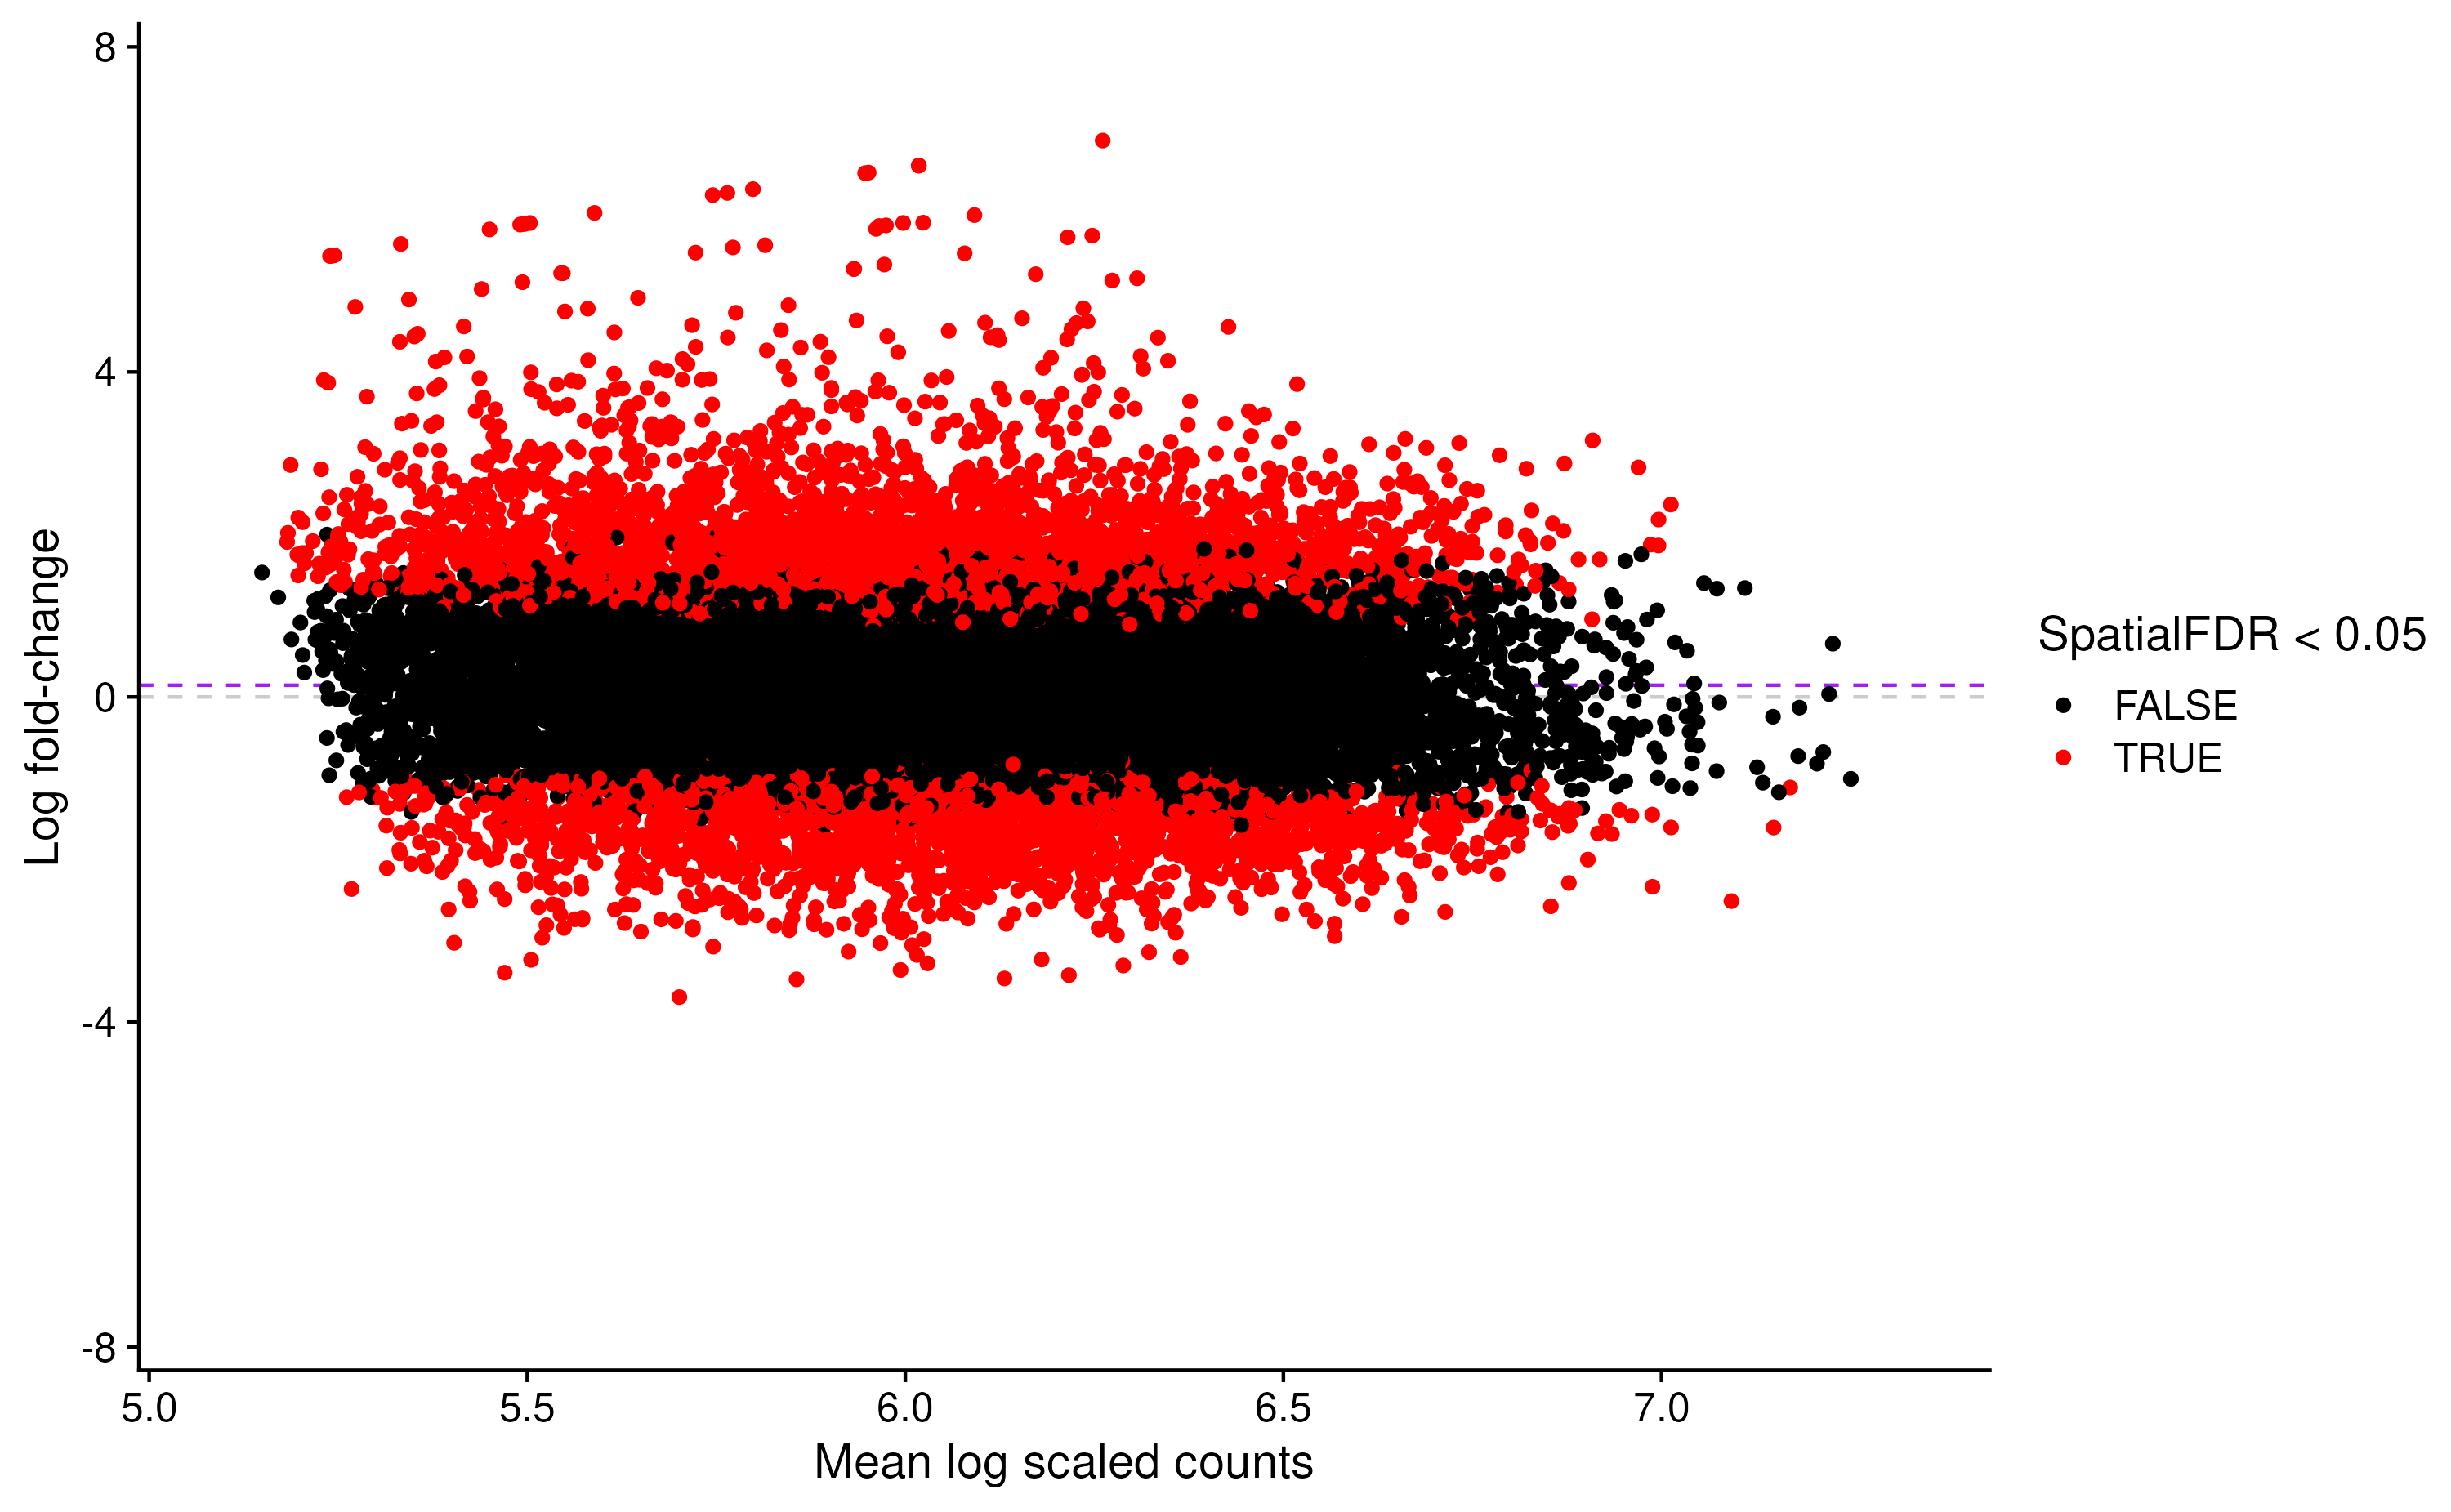


**Supplemental Figure S2** MA plot of miloR neighborhoods. Horizontal, centered distribution indicates effective control of class imbalance. Gray dashed lined: expected null log fold-change. Purple dashed line: observed log fold change for non-differentially abundant (SpatialFDR > 0.05) neighborhoods. If class imbalance is effectively controlled by the model, the distribution of neighborhoods will be roughly horizontal and centered near 0 on the y-axis.

| Phenotype | Key Markers | Citations |
| --- | --- | --- |
| Cancer cells | AE1/AE3+, EGFR+ | 1,2 |
| Proliferating cancer cells | AE1/AE3+, EGFR+, Ki-67+ | 3,4 |
| HLA-ABC+ cancer cells | AE1/AE3+, HLA-ABC+ | 5,6 |
| Early-activated dendritic/natural killer cells | CD69, CD11c+, CD56+, PD-L1+, Perforin+ | 7,8 |
| NK cells | CD56(bright), Granzyme B+, Perforin+ | 9, 10 |
| Exhausted/Immature NK cells | CD56(dim), CCR7(reduced), Granzyme B-, Perforin+ | 11,12 |
| Activated CD8+ T cells | CD45RO+, CD8+, Perforin+, HLA-DR+ | 13 |
| Activated effector memory CD4+ T cells | CD45RO+, CD4+, Granzyme B+, Perforin + | 14,15 |
| Activated cytotoxic CD4+ T cells | CD4+, CCR7+, Granzyme B+, Perforin + | 14,15 |
| T-regulatory cells | CD45RO+, CD4+ CD25+ | 16,17 |
| Proliferating cells | Ki-67+ | 18 |
| Other cells | none | none |

**Supplemental Table S3** Cell phenotype definitions, key markers, and references used to classify tumor and immune-cell subsets in TNBC. See supplementary citations for further biological rationale.

**References:**

1. Moll R, Franke WW, Schiller DL, Geiger B, Krepler R. The catalog of human cytokeratins: Patterns of expression in normal epithelia, tumors and cultured cells. Cell. 1982;31(1):11–24.
2. Hynes NE, Lane HA. ERBB receptors and cancer: the complexity of targeted inhibitors. Nature Reviews Cancer. 2005;5(5):341–54.
3. Scholzen T, Gerdes J. The Ki-67 protein: from the known to the unknown. Journal of Cellular Physiology. 2000;182(3):311–22.
4. Dowsett M, Nielsen TO, A'Hern R, Bartlett J, Coombes RC, Cuzick J. Assessment of Ki67 in breast cancer: recommendations from the International Ki67 in Breast Cancer Working Group. Journal of the National Cancer Institute. 2011;103(22):1656–64.
5. Garrido F, Aptsiauri N, Doorduijn EM, Lora AM, van Hall T. The urgent need to recover MHC class I in cancers for effective immunotherapy. Nature Reviews Cancer. 2016;16(12):767–81.
6. McGranahan N, Rosenthal R, Hiley CT, Rowan AJ, Watkins TBK, Wilson GA. Allele-specific HLA loss and immune escape in lung cancer evolution. Cell. 2017;171(6):1259–71.e11.
7. Cibrián D, Sánchez-Madrid F. CD69: from activation marker to metabolic gatekeeper. Eur J Immunol. 2017;47(6):946–53.
8. Voskoboinik I, Whisstock JC, Trapani JA. Perforin and granzymes: function, dysfunction and human pathology. Nat Rev Immunol. 2015;15(6):388–400.
9. Caligiuri MA. Human natural killer cells. Blood. 2008;112(3):461–9.
10. Campbell JJ, Qin S, Unutmaz D, Soler D, Murphy KE, Hodge MR, et al. Unique subpopulations of CD56+ NK and NK-T peripheral blood lymphocytes identified by chemokine receptor expression repertoire. J Immunol. 2001;166(11):6477–82.
11. Bi J, Tian Z. NK Cell Exhaustion. Front Immunol. 2017;8:760.
12. Shi Y, Hao D, Qian H, Tao Z. Natural killer cell-based cancer immunotherapy: from basics to clinical trials. Exp Hematol Oncol. 2024;13(1):101.
13. Gonzalez SM, Taborda NA, Rugeles MT. Role of Different Subpopulations of CD8(+) T Cells during HIV Exposure and Infection. Front Immunol. 2017;8:936.
14. Takeuchi A, Saito T. CD4 CTL, a Cytotoxic Subset of CD4(+) T Cells, Their Differentiation and Function. Front Immunol. 2017;8:194.
15. Oja AE, Vieira Braga FA, Remmerswaal EB, Kragten NA, Hertoghs KM, Zuo J, et al. The Transcription Factor Hobit Identifies Human Cytotoxic CD4(+) T Cells. Front Immunol. 2017;8:325.
16. Plitas G, Konopacki C, Wu K, Bos PD, Morrow M, Putintseva EV, et al. Regulatory T Cells Exhibit Distinct Features in Human Breast Cancer. Immunity. 2016;45(5):1122–34.
17. Kotsakis A, Koinis F, Katsarou A, Gioulbasani M, Aggouraki D, Kentepozidis N, et al. Prognostic value of circulating regulatory T cell subsets in untreated non-small cell lung cancer patients. Sci Rep. 2016;6:39247.
18. Gerdes J, Schwab U, Lemke H, Stein H. Production of a mouse monoclonal antibody reactive with a human nuclear antigen associated with cell proliferation. Int J Cancer. 1983;31(1):13–20.


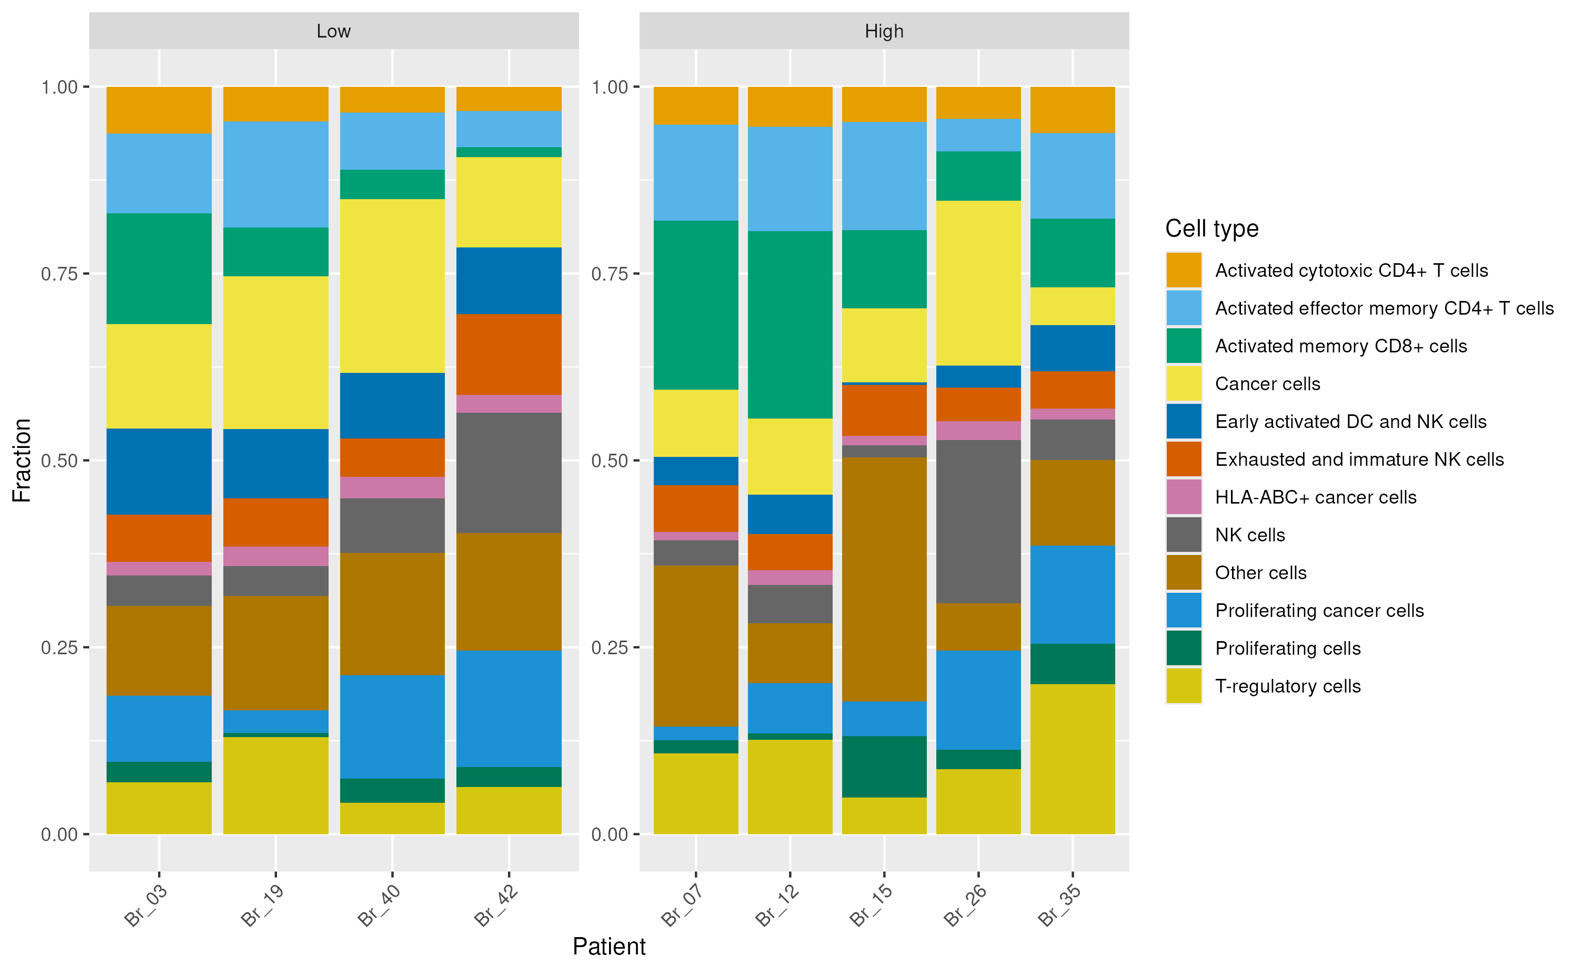


**Supplemental Figure S3** Fractional composition plot showing fraction of each cell type per deidentified patient sample (Br).
